# Supplementary material for: Genome analysis of Clostridium perfringens isolates from healthy and necrotic enteritis infected chickens and turkeys
Source: PubMed Central journal article supplement (PMC5504799; doi:10.1186/s13104-017-2594-9), 2017-07-11
Supplement: 13104_2017_2594_MOESM1_ESM.pdf [file 13104_2017_2594_MOESM1_ESM.pdf]

**Table S1. 30 *C. perfringens* isolates from healthy and NE infected poultry**

| Isolate | Animal  | State    | Sample    | Farm | Country/year | Reference              | SRA acc. no. |
|---------|---------|----------|-----------|------|--------------|------------------------|--------------|
| C1      | Chicken | Healthy  | Intestine | 1    | Denmark/2001 | (Nauerby et al., 2003) | SRR4448030   |
| C3      | Chicken | Healthy  | Intestine | 1    | Denmark/2001 | (Nauerby et al., 2003) | SRR4448031   |
| C7      | Chicken | Healthy  | Intestine | 2    | Denmark/2001 | (Nauerby et al., 2003) | SRR4448028   |
| C8      | Chicken | Healthy  | Intestine | 2    | Denmark/2001 | (Nauerby et al., 2003) | SRR4448029   |
| C24     | Chicken | Diseased | Intestine | 3    | Denmark/2001 | (Nauerby et al., 2003) | SRR4457405   |
| C25     | Chicken | Diseased | Intestine | 4    | Denmark/2000 | (Nauerby et al., 2003) | SRR4457404   |
| C26     | Chicken | Diseased | Intestine | 5    | Denmark/2000 | (Nauerby et al., 2003) | SRR4457403   |
| C27     | Chicken | Diseased | Liver     | 6    | Denmark/1997 | (Nauerby et al., 2003) | SRR4457402   |
| C31     | Chicken | Diseased | Liver     | 7    | Denmark/1998 | (Nauerby et al., 2003) | SRR4457406   |
| C32     | Chicken | Diseased | Liver     | 8    | Denmark/1998 | (Nauerby et al., 2003) | SRR4457397   |
| C33     | Chicken | Diseased | Liver     | 9    | Denmark/1998 | (Nauerby et al., 2003) | SRR4448032   |
| C36     | Chicken | Diseased | Liver     | 10   | Denmark/1998 | (Nauerby et al., 2003) | SRR4457399   |
| C37     | Chicken | Diseased | Intestine | 11   | Denmark/1999 | (Nauerby et al., 2003) | SRR4457398   |
| C41     | Chicken | Diseased | Intestine | 10   | Denmark/2002 | (Nauerby et al., 2003) | SRR4457408   |
| C48     | Chicken | Diseased | Intestine | 12   | Denmark/2002 | (Nauerby et al., 2003) | SRR4457407   |
| C124    | Chicken | Diseased | Liver     | 13   | Denmark/1997 | (Nauerby et al., 2003) | SRR4457401   |
| C125    | Chicken | Diseased | Intestine | 14   | Denmark/2000 | (Nauerby et al., 2003) | SRR4457400   |
| T1      | Turkey  | Diseased | Intestine | 15   | Finland/1998 | (Lyhs et al., 2013)    | SRR4434753   |
| T5      | Turkey  | Diseased | Intestine | 16   | Finland/2005 | (Lyhs et al., 2013)    | SRR4434754   |
| T6      | Turkey  | Diseased | Intestine | 17   | Finland/2005 | (Lyhs et al., 2013)    | SRR4434751   |
| T11     | Turkey  | Diseased | Intestine | 16   | Finland/2006 | (Lyhs et al., 2013)    | SRR4434752   |
| T14     | Turkey  | Diseased | Intestine | 18   | Finland/2006 | (Lyhs et al., 2013)    | SRR4434749   |
| T16     | Turkey  | Diseased | Intestine | 17   | Finland/2008 | (Lyhs et al., 2013)    | SRR4434750   |
| T18     | Turkey  | Healthy  | Intestine | 17   | Finland/2009 | (Lyhs et al., 2013)    | SRR4434747   |
| T22     | Turkey  | Healthy  | Intestine | 19   | Finland/2009 | (Lyhs et al., 2013)    | SRR4434748   |
| T34     | Turkey  | Healthy  | Intestine | 17   | Finland/2009 | (Lyhs et al., 2013)    | SRR4434755   |
| T43     | Turkey  | Healthy  | Intestine | 20   | Finland/2009 | (Lyhs et al., 2013)    | SRR4434756   |
| T46     | Turkey  | Diseased | Intestine | 18   | Finland/2010 | (Lyhs et al., 2013)    | SRR4434757   |
| T53     | Turkey  | Diseased | Intestine | 21   | Finland/2010 | (Lyhs et al., 2013)    | SRR4434758   |
| T84     | Turkey  | Diseased | Intestine | 16   | Finland/2011 | (Lyhs et al., 2013)    | SRR4434759   |
