# Supplementary material for: Genome analysis of Clostridium perfringens isolates from healthy and necrotic enteritis infected chickens and turkeys
Source: PubMed Central journal article supplement (PMC5504799; doi:10.1186/s13104-017-2594-9), 2017-07-11
Supplement: 13104_2017_2594_MOESM3_ESM.pdf [file 13104_2017_2594_MOESM3_ESM.pdf]

**Table S3. Presence of NELoc-1 and -3 genes in the high prevalence groups**

|            |            |            |            |            |            |            |            |             |             |            | <b>NeLoc-1 (33 ORFs)</b> |                                                          |  |
|------------|------------|------------|------------|------------|------------|------------|------------|-------------|-------------|------------|--------------------------|----------------------------------------------------------|--|
| <b>C24</b> | <b>C26</b> | <b>C31</b> | <b>C33</b> | <b>C36</b> | <b>C37</b> | <b>C41</b> | <b>C48</b> | <b>C124</b> | <b>C125</b> | <b>T11</b> | <b>T53</b>               | <b>Locus tag/gene product</b>                            |  |
| +          | +          | +          | +          | +          | +          | +          | +          | +           | +           | +          | +                        | CP4_3442/transcriptional regulator, MarR family          |  |
| +          | +          | +          | +          | +          | +          | +          | +          | +           | +           | +          | +                        | CP4_3443/ $\beta$ -lactamase domain containing protein   |  |
| +          | +          | +          | +          | +          | +          | +          | +          | +           | +           | +          | +                        | CP4_3444/M protein trans-acting positive regulator (MGA) |  |
| +          | +          | +          | +          | +          | +          | +          | +          | +           | +           | +          | +                        | CP4_3445/putative radical SAM domain containing protein  |  |
| +          | +          | +          | +          | +          | +          | +          | +          | +           | +           | +          | +                        | CP4_3446/putative internalin                             |  |
| +          | +          | +          | +          | +          | +          | +          | +          | +           | +           | +          | +                        | CP4_3447/putative protein                                |  |
| +          | +          | +          | +          | +          | +          | +          | +          | +           | +           | +          | +                        | CP4_3448/putative protein                                |  |
| +          | +          | +          | +          | +          | +          | +          | +          | +           | +           | +          | +                        | CP4_3449/NE toxin B (NetB)                               |  |
| +          | +          | +          | +          | +          | +          | +          | +          | +           | +           | +          | +                        | CP4_3450/ricin-type $\beta$ -trefoil domain protein      |  |
| +          | +          | +          | +          | +          | +          | +          | +          | +           | +           | +          | +                        | CP4_3451/transposase for transposon                      |  |
| +          | +          | +          | +          | +          | +          | +          | +          | +           | +           | +          | +                        | CP4_3452/hypothetical protein                            |  |
| +          | +          | +          | +          | +          | +          | +          | +          | +           | +           | +          | +                        | CP4_3453/hypothetical protein                            |  |
| +          | +          | +          | +          | +          | +          | +          | +          | +           | +           | +          | +                        | CP4_3454/chitinase B                                     |  |
| +          | +          | +          | +          | +          | +          | +          | +          | +           | +           | +          | +                        | CP4_3455/chitodextrinase                                 |  |
| +          | +          | +          | +          | +          | +          | +          | +          | +           | +           | +          | +                        | CP4_3457/CAAX amino terminal protease                    |  |
| +          | +          | +          | +          | +          | +          | +          | +          | +           | +           | +          | +                        | CP4_3458/putative $\beta$ -toxin                         |  |
| +          | +          | +          | +          | +          | +          | +          | +          | +           | +           | +          | +                        | CP4_3459/putative $\beta$ -toxin                         |  |
| +          | +          | +          | +          | +          | +          | +          | +          | +           | +           | +          | +                        | CP4_3460/conserved hypothetical protein                  |  |
| +          | +          | +          | +          | +          | +          | +          | +          | +           | +           | +          | +                        | CP4_3461/conserved hypothetical protein                  |  |
| +          | +          | +          | +          | +          | +          | +          | +          | +           | +           | +          | +                        | CP4_3462/conserved hypothetical protein                  |  |
| +          | +          | +          | +          | +          | +          | +          | +          | +           | +           | +          | +                        | CP4_3464/resolvase recombinase                           |  |
| +          | +          | +          | +          | +          | +          | +          | +          | +           | +           | +          | +                        | CP4_3465/resolvase recombinase                           |  |
| +          | +          | +          | +          | +          | +          | +          | +          | +           | +           | +          | +                        | CP4_3466/putative membrane protein                       |  |
| +          | +          | +          | +          | +          | +          | +          | +          | +           | +           | +          | +                        | CP4_3468/F5/8 type C domain containing protein           |  |
| +          | +          | +          | +          | +          | +          | +          | +          | +           | +           | +          | +                        | CP4_3469/phosphodiesterase domain 2                      |  |
| +          | +          | +          | +          | +          | +          | +          | +          | +           | +           | +          | +                        | CP4_3470/sortase family protein                          |  |
| +          | +          | +          | +          | +          | +          | +          | +          | +           | +           | +          | +                        | CP4_3471/putative surface protein                        |  |
| +          | +          | +          | +          | +          | +          | +          | +          | +           | +           | +          | +                        | CP4_3472/peptidoglycan bound protein                     |  |
| +          | +          | +          | +          | +          | +          | +          | +          | +           | +           | +          | +                        | CP4_3473/cell wall surface anchor protein                |  |
| +          | +          | +          | +          | +          | +          | +          | +          | +           | +           | +          | +                        | CP4_3474/signal peptidase I                              |  |
| +          | +          | +          | +          | +          | +          | +          | +          | +           | +           | +          | +                        | CP4_3476/hypothetical protein                            |  |
| +          | +          | +          | +          | +          | +          | +          | +          | +           | +           | +          | +                        | CP4_3477/swim zinc finger domain                         |  |
| +          | +          | +          | +          | +          | +          | +          | +          | +           | +           | +          | +                        | CP4_3478/diguanylate cyclase                             |  |
|            |            |            |            |            |            |            |            |             |             |            | <b>NeLoc-3 (5 ORFs)</b>  |                                                          |  |
| <b>C24</b> | <b>C26</b> | <b>C31</b> | <b>C33</b> | <b>C36</b> | <b>C37</b> | <b>C41</b> | <b>C48</b> | <b>C124</b> | <b>C125</b> | <b>T11</b> | <b>T53</b>               | <b>Locus tag/gene product</b>                            |  |
| +          | +          | +          | +          | +          | +          | +          | +          | +           | +           | +          | +                        | CP4_3567/conserved hypothetical protein                  |  |
| +          | +          | +          | +          | +          | +          | +          | +          | +           | +           | +          | +                        | CP4_3568/hypothetical protein                            |  |
| +          | +          | +          | +          | +          | +          | +          | +          | +           | +           | +          | +                        | CP4_3569/resolvase/recombinase                           |  |
| +          | +          | +          | +          | +          | +          | +          | +          | +           | +           | +          | +                        | CP4_3570/conserved hypothetical protein                  |  |
| +          | +          | +          | +          | +          | +          | +          | +          | +           | +           | +          | +                        | CP4_3572/NADP-dependent 7- $\alpha$ -HSD                 |  |

The locus tag and the gene product of the NELoc-1 and -3 associated genes are shown (Lepp et al., 2013). + indicates presence respectively, among the *C. perfringens* isolates. Only isolates with high prevalence of the NELoc-1 and -3 genes are presented.
