# Supplementary material for: Genome analysis of Clostridium perfringens isolates from healthy and necrotic enteritis infected chickens and turkeys
Source: PubMed Central journal article supplement (PMC5504799; doi:10.1186/s13104-017-2594-9), 2017-07-11
Supplement: 13104_2017_2594_MOESM4_ESM.pdf [file 13104_2017_2594_MOESM4_ESM.pdf]

**Table S4. NELoc-2 genes identified among the *C. perfringens* isolates**

|    |    |     |     |     |     |     |     |     |     |      | NeLoc-2 (11 ORFs) |    |    |     |     |                                          |
|----|----|-----|-----|-----|-----|-----|-----|-----|-----|------|-------------------|----|----|-----|-----|------------------------------------------|
| C7 | C8 | C24 | C26 | C31 | C33 | C36 | C37 | C41 | C48 | C124 | C125              | T1 | T5 | T11 | T43 | Locus tag/gene product                   |
| +  | +  | +   | +   | +   | +   | +   | +   | +   | +   | +    | +                 | +  | +  | +   | +   | CP4_0458/sigma factor Sgil               |
| +  | +  | +   | +   | +   | +   | +   | +   | +   | +   | +    | +                 | +  | +  | +   | +   | CP4_0459/conserved hypothetical protein  |
| +  | +  | +   | +   | +   | +   | +   | +   | +   | +   | +    | +                 | +  | +  | +   | +   | CP4_0460/putative VTC domain superfamily |
| +  | +  | +   | +   | +   | +   | +   | +   | +   | +   | +    | +                 | +  | +  | +   | +   | CP4_0461/ putative tubulin/FtsZ, GTPase  |
| +  | +  | +   | +   | +   | +   | +   | +   | +   | +   | +    | +                 | +  | +  | +   | +   | CP4_0462/resolvase                       |
| +  | +  | +   | +   | +   | +   | +   | +   | +   | +   | +    | +                 | +  | +  | +   | +   | CP4_0463/putative VTC domain superfamily |
| +  | +  | +   | +   | +   | +   | +   | +   | +   | +   | +    | +                 | +  | +  | +   | +   | CP4_0464/ tubulin/FtsZ, GTPase           |
| +  | +  | +   | +   | +   | +   | +   | +   | +   | +   | +    | +                 | +  | +  | +   | +   | CP4_0465/ CotH protein                   |
| +  | +  | +   | +   | +   | +   | +   | +   | +   | +   | +    | +                 | +  | +  | +   | +   | CP4_0466/conserved hypothetical protein  |
| +  | +  | +   | +   | +   | +   | +   | +   | +   | +   | +    | +                 | +  | +  | +   | +   | CP4_0467/putative heat repeat            |
| +  | +  | +   | +   | +   | +   | +   | +   | +   | +   | +    | +                 | +  | +  | +   | +   | CP4_0468 chitin synthase                 |

The locus tag and the gene product of the NELoc-2 associated genes are shown (Lepp et al., 2013). + indicates presence of genes and NELoc-2 was fully conserved among all isolates from this table.
